# Supplementary material for: A DPPH· Kinetic Approach on the Antioxidant Activity of Various Parts and Ripening Levels of Papaya (Carica papaya L.) Ethanolic Extracts
Source: MDPI journal article supplement (doi:10.3390/plants10081679), 2021-08-15
Supplement: s1 [file s1]

## Supplementary material

# A DPPH· Kinetic Approach on the Antioxidant Activity of Various Parts and Ripening Levels of Papaya (*Carica papaya* L.) Ethanolic Extracts

Olimpia Alina Iordănescu <sup>1,†</sup>, Maria Băla <sup>1,†</sup>, Dina Gligor (Pane) <sup>2</sup>, Simelda Elena Zippenfening <sup>2</sup>, Marius Ioan Cugorean <sup>2</sup>, Mircea Ionuț Petroman <sup>3</sup>, Daniel I. Hădărugă <sup>2,4</sup>, Nicoleta G. Hădărugă <sup>2,5,\*</sup>, Mircea Riviș <sup>6</sup>

<sup>1</sup> Department of Horticulture, Banat's University of Agricultural Sciences and Veterinary Medicine "King Michael I of Romania" from Timișoara, Calea Aradului 119, 300645-Timișoara, Romania; olimpia.iordanescu@yahoo.com (O.A.I.); mariabalamonicabala@yahoo.com (M.B.)

<sup>2</sup> Doctoral School "Engineering of Vegetable and Animal Resources", Banat's University of Agricultural Sciences and Veterinary Medicine "King Michael I of Romania" from Timișoara, Calea Aradului 119, 300645-Timișoara, Romania; gligor\_dina\_bihor@yahoo.com (D.G.P.); simelda\_zippenfening@yahoo.com (S.E.Z.); marius\_03cuge@yahoo.com (M.I.C.)

<sup>3</sup> SC Merpano SRL, Complexului Str. 10, 307370 – Săcălaz, Timiș county, Romania; petromanionut@yahoo.com (M.I.P.)

<sup>4</sup> Department of Applied Chemistry, Organic and Natural Compounds Engineering, Polytechnic University of Timișoara, Carol Telbisz 6, 300001 – Timișoara, Romania; daniel.hadaruga@upt.ro (D.I.H.)

<sup>5</sup> Department of Food Science, Banat's University of Agricultural Sciences and Veterinary Medicine "King Michael I of Romania" from Timișoara, Calea Aradului 119, 300645 – Timișoara, Romania; nicoletahadaruga@usab-tm.ro; nico\_hadaruga@yahoo.com (N.G.H.)

<sup>6</sup> Department of Dental Medicine, "Victor Babeș" University of Medicine and Pharmacy Timișoara, Eftimie Murgu Sq. 2, 300041-Timișoara, Romania, mrivis@yahoo.com (M.R.)

\* Correspondence: nico\_hadaruga@yahoo.com; Tel.: +40-256-277-423

† These authors contributed equally to this work. They are both principal authors.

**Citation:** Iordănescu, O.A.; Băla, M.; Gligor (Pane), D.; Zippenfening, S.E.; Cugorean, M.I.; Petroman, M.I.; Hădărugă, D.I.; Hădărugă, N.G.; Riviș, M. A DPPH· Kinetic Approach on the Antioxidant Activity of Various Parts and Ripening Levels of Papaya (*Carica papaya* L.) Ethanolic Extracts. *Plants* **2021**, *10*, 1679. <https://doi.org/10.3390/plants10081679>

**Publisher's Note:** MDPI stays neutral with regard to jurisdictional claims in published maps and institutional affiliations.

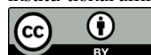

Copyright: © 2021 by the authors. Licensee MDPI, Basel, Switzerland. This article is an open access article distributed under the terms and conditions of the Creative Commons Attribution (CC BY) license (<http://creativecommons.org/licenses/by/4.0/>).

**Abstract:** Papaya fruits (*Carica papaya* L.) are valuable both as food, including concentrates and mixed beverages, and in traditional medicine. The goal of the study was to evaluate the antioxidant activity of various parts of unripe and ripe papaya fruit from the DPPH· kinetics point of view. Peel, pulp, seed and seed-pulp of unripe and ripe papaya fruits ( $\frac{1}{4}$  and  $>\frac{3}{4}$  level of ripening) were extracted with ethanol and monitored at 517 nm in the presence of DPPH·. The radical scavenging capacity (RSC) at various time ranges and DPPH· reaction rates for specific time intervals were determined. The highest RSC values were obtained for papaya pulp extracts, consistently higher for the ripe samples in comparison with the unripe ones (86.4% and 41.3%). The DPPH· rates significantly differ for the unripe and ripe papaya extracts, especially for the first time range. They are more than double for the ripe papaya. These values were 2.70, 4.00, 3.25, 2.75  $\mu\text{M/s}$  for the peel, pulp, seed, seed-pulp extracts from the ripe papaya and only 1.00, 1.65, 1.40, 1.80  $\mu\text{M/s}$  for the unripe samples. DPPH· kinetic approach can be useful for a fast and simple evaluation of the overall antioxidant properties of fruit extracts.

**Keywords:** unripe and ripe papaya; *Carica papaya* L.; kinetics; antioxidant activity; radical scavenging capacity; DPPH· reaction rate; papaya extracts; non-alcoholic and alcoholic beverages

## 1. Radical scavenging capacity of unripe and ripe papaya

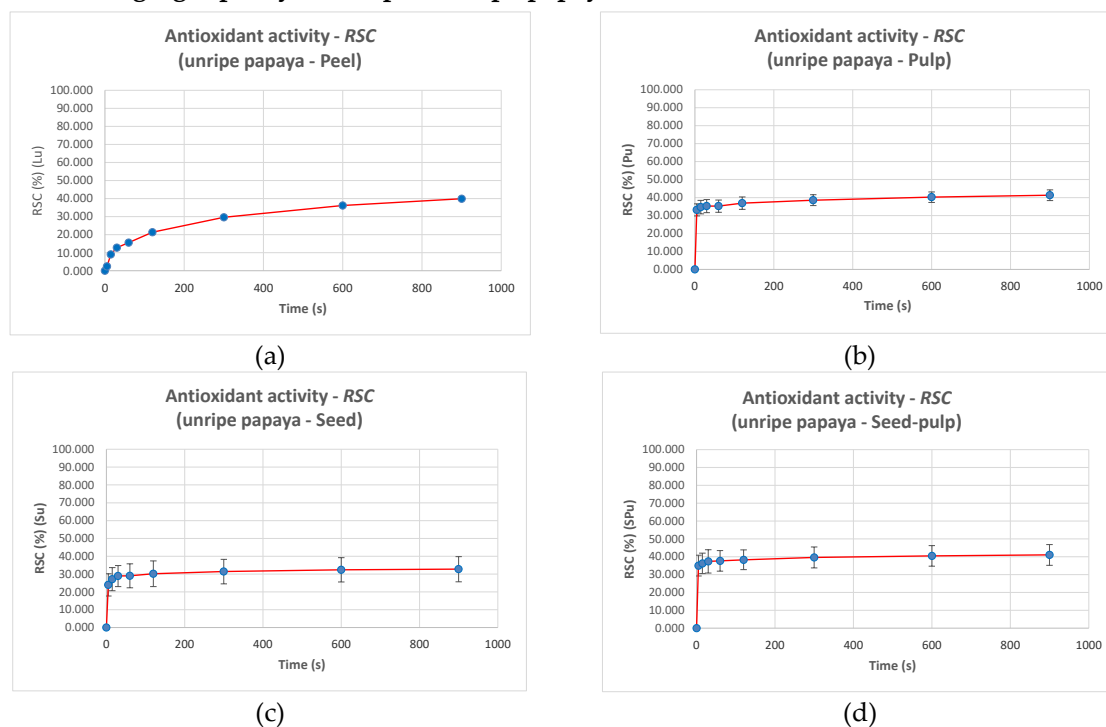

**Figure S1.** The variation of RSC (%) versus Time (s) for the extracts obtained from unripe papaya parts in the presence of DPPH- ethanolic solution: (a) unripe papaya extract from peel (one determination); (b) unripe papaya extract from pulp; (c) unripe papaya extract from seeds; (d) unripe papaya extract from seed-pulp (surrounding pulp from the seeds region).

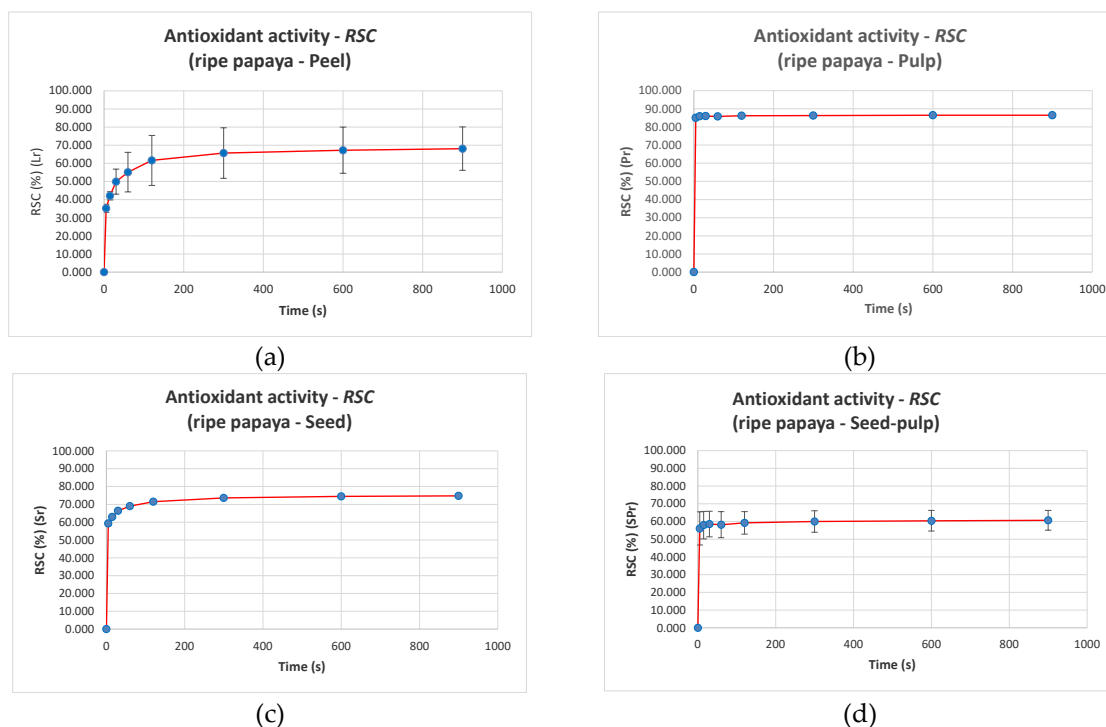

**Figure S2.** The variation of RSC (%) versus Time (s) for the extracts obtained from ripe papaya parts in the presence of DPPH- ethanolic solution: (a) ripe papaya extract from peel; (b) ripe papaya extract from pulp (one determination); (c) ripe papaya extract from seeds; (d) ripe papaya extract from seed-pulp (surrounding pulp from the seeds region).

**Table S1.** Significant *p*-levels from the Fisher's LSD test (least significant difference) for the antioxidant activity of papaya extracts (RSC – radical scavenging activity, %, at 5 s from the initiation of DPPH· reaction; unripe papaya peel, pulp, seed and seed-pulp: *Lu*, *Pu*, *Su* and *SPu*; ripe papaya peel, pulp, seed and seed-pulp: *Lr*, *Pr*, *Sr* and *SPr*); *p*-level values lower than 0.05.

|            | <i>Lu</i> | <i>Lr</i>       | <i>Pu</i>       | <i>Pr</i>       | <i>Su</i>       | <i>Sr</i>       | <i>SPu</i>      | <i>SPr</i>      |
|------------|-----------|-----------------|-----------------|-----------------|-----------------|-----------------|-----------------|-----------------|
| <i>Lu</i>  |           | <b>0.021042</b> | <b>0.025855</b> | <b>0.001296</b> | 0.053859        | <b>0.003058</b> | 0.059249        | <b>0.003793</b> |
| <i>Lr</i>  |           |                 | 0.791882        | <b>0.004989</b> | 0.601529        | <b>0.029300</b> | 0.538517        | <b>0.045126</b> |
| <i>Pu</i>  |           |                 |                 | <b>0.004309</b> | 0.753851        | <b>0.022658</b> | 0.681674        | <b>0.034198</b> |
| <i>Pr</i>  |           |                 |                 |                 | <b>0.005922</b> | <b>0.044662</b> | <b>0.005571</b> | <b>0.031333</b> |
| <i>Su</i>  |           |                 |                 |                 |                 | <b>0.030521</b> | 0.931513        | <b>0.043432</b> |
| <i>Sr</i>  |           |                 |                 |                 |                 |                 | <b>0.027660</b> | 0.679093        |
| <i>SPu</i> |           |                 |                 |                 |                 |                 |                 | <b>0.039114</b> |
| <i>SPr</i> |           |                 |                 |                 |                 |                 |                 |                 |

**Table S2.** Significant *p*-levels from the Fisher's LSD test (least significant difference) for the antioxidant activity of papaya extracts (RSC – radical scavenging activity, %, at 1 min from the initiation of DPPH· reaction; unripe papaya peel, pulp, seed and seed-pulp: *Lu*, *Pu*, *Su* and *SPu*; ripe papaya peel, pulp, seed and seed-pulp: *Lr*, *Pr*, *Sr* and *SPr*); *p*-level values lower than 0.05 are bolded.

|            | <i>Lu</i> | <i>Lr</i>       | <i>Pu</i> | <i>Pr</i>       | <i>Su</i>       | <i>Sr</i>       | <i>SPu</i>      | <i>SPr</i>      |
|------------|-----------|-----------------|-----------|-----------------|-----------------|-----------------|-----------------|-----------------|
| <i>Lu</i>  |           | <b>0.028284</b> | 0.170572  | <b>0.006676</b> | 0.212305        | <b>0.010504</b> | 0.294668        | <b>0.022345</b> |
| <i>Lr</i>  |           |                 | 0.106890  | 0.059857        | 0.174544        | 0.222450        | 0.120233        | 0.766243        |
| <i>Pu</i>  |           |                 |           | <b>0.012691</b> | 0.967248        | <b>0.024539</b> | 0.795432        | 0.075085        |
| <i>Pr</i>  |           |                 |           |                 | <b>0.021164</b> | 0.227368        | <b>0.016678</b> | 0.079100        |
| <i>Su</i>  |           |                 |           |                 |                 | <b>0.047485</b> | 0.794925        | 0.128958        |
| <i>Sr</i>  |           |                 |           |                 |                 |                 | <b>0.034584</b> | 0.323542        |
| <i>SPu</i> |           |                 |           |                 |                 |                 |                 | 0.089675        |
| <i>SPr</i> |           |                 |           |                 |                 |                 |                 |                 |

**Table S3.** Significant *p*-levels from the Fisher's LSD test (least significant difference) for the antioxidant activity of papaya extracts (RSC – radical scavenging activity, %, at 5 min from the initiation of DPPH· reaction; unripe papaya peel, pulp, seed and seed-pulp: *Lu*, *Pu*, *Su* and *SPu*; ripe papaya peel, pulp, seed and seed-pulp: *Lr*, *Pr*, *Sr* and *SPr*); *p*-level values lower than 0.05 are bolded.

|            | <i>Lu</i> | <i>Lr</i> | <i>Pu</i> | <i>Pr</i>       | <i>Su</i>       | <i>Sr</i>       | <i>SPu</i>      | <i>SPr</i> |
|------------|-----------|-----------|-----------|-----------------|-----------------|-----------------|-----------------|------------|
| <i>Lu</i>  |           | 0.054618  | 0.541644  | <b>0.021549</b> | 0.608266        | <b>0.030311</b> | 0.802662        | 0.085867   |
| <i>Lr</i>  |           |           | 0.068263  | 0.199009        | 0.109757        | 0.505909        | 0.075793        | 0.632393   |
| <i>Pu</i>  |           |           |           | <b>0.023549</b> | 0.981152        | <b>0.032615</b> | 0.738403        | 0.121243   |
| <i>Pr</i>  |           |           |           |                 | <b>0.036000</b> | 0.399771        | <b>0.027412</b> | 0.121612   |
| <i>Su</i>  |           |           |           |                 |                 | 0.057255        | 0.787432        | 0.179004   |
| <i>Sr</i>  |           |           |           |                 |                 |                 | <b>0.040806</b> | 0.280449   |
| <i>SPu</i> |           |           |           |                 |                 |                 |                 | 0.121526   |
| <i>SPr</i> |           |           |           |                 |                 |                 |                 |            |

**Table S4.** Significant *p*-levels from the Fisher's LSD test (least significant difference) for the antioxidant activity of papaya extracts (RSC – radical scavenging activity, %, at 15 min from the initiation of DPPH· reaction; unripe papaya peel, pulp, seed and seed-pulp: *Lu*, *Pu*, *Su* and *SPu*; ripe papaya peel, pulp, seed and seed-pulp: *Lr*, *Pr*, *Sr* and *SPr*). *p*-level values lower than 0.05 are bolded.

|            | <i>Lu</i> | <i>Lr</i> | <i>Pu</i>       | <i>Pr</i>       | <i>Su</i>       | <i>Sr</i>       | <i>SPu</i>      | <i>SPr</i> |
|------------|-----------|-----------|-----------------|-----------------|-----------------|-----------------|-----------------|------------|
| <i>Lu</i>  |           | 0.074085  | 0.913431        | <b>0.026359</b> | 0.991059        | <b>0.041067</b> | 0.744239        | 0.151771   |
| <i>Lr</i>  |           |           | <b>0.048724</b> | 0.192485        | 0.072989        | 0.524585        | <b>0.048460</b> | 0.480014   |
| <i>Pu</i>  |           |           |                 | <b>0.018251</b> | 0.903203        | <b>0.024940</b> | 0.630847        | 0.113015   |
| <i>Pr</i>  |           |           |                 |                 | <b>0.026073</b> | 0.375131        | <b>0.019320</b> | 0.092559   |
| <i>Su</i>  |           |           |                 |                 |                 | <b>0.040512</b> | 0.752553        | 0.149355   |
| <i>Sr</i>  |           |           |                 |                 |                 |                 | <b>0.027898</b> | 0.214413   |
| <i>SPu</i> |           |           |                 |                 |                 |                 |                 | 0.095611   |
| <i>SPr</i> |           |           |                 |                 |                 |                 |                 |            |

**Table S5.** Antioxidant activity results (RSC – radical scavenging capacity, %, at various reaction times) for standard antioxidant compounds (*PG\_1mM/0.2mM/0.1mM/0.05mM* – propyl gallate ethanolic solutions at concentrations of 1, 0.2, 0.1 and 0.05 mM; *CA\_1mM/0.2mM/0.1mM/0.05mM* – caffeic acid ethanolic solutions at concentrations of 1, 0.2, 0.1 and 0.05 mM; *BHA\_1mM* – *tert*-butylated hydroxyanisole ethanolic solution at a concentration of 1 mM). Values are means of duplicate analysis, with RSD < 5% (from [1], with permission).

| Nº | Code             | RSC (1 min) (%) | RSC (5 min) (%) | RSC (15 min) (%) |
|----|------------------|-----------------|-----------------|------------------|
| 1  | <i>PG_1mM</i>    | 93.72           | 93.77           | 93.98            |
| 2  | <i>PG_0.2mM</i>  | 69.52           | 77.89           | 83.32            |
| 3  | <i>PG_0.1mM</i>  | 39.50           | 41.91           | 44.86            |
| 4  | <i>PG_0.05mM</i> | 27.99           | 24.79           | 26.27            |
| 5  | <i>CA_1mM</i>    | 65.55           | 90.30           | 92.41            |
| 6  | <i>CA_0.2mM</i>  | 32.49           | 48.82           | 53.08            |
| 7  | <i>CA_0.1mM</i>  | 37.12           | 31.67           | 32.95            |
| 8  | <i>CA_0.05mM</i> | 13.16           | 14.37           | 14.81            |
| 9  | <i>BHA_1mM</i>   | 22.19           | 68.21           | 86.46            |

**Table S6.** Antioxidant activity results (RSC – radical scavenging activity, %, at various reaction times) for other fruit extracts (*Pg\_J(1:50/1:100)* – pomegranate raw juice, 1:50 and 1:100 dilution; *Pg\_Rp/Wp(1:50/1:100)* – pomegranate red/white peel ethanolic extracts, 1:50 and 1:100 dilution; *Pg\_P/S* – pomegranate pulp and seed ethanolic extracts, 1:50 and 1:100 dilution). Values are expressed as mean ( $\pm$ standard deviation, SD) for multiplicate analysis ( $n = 7$  for *Pg\_J* samples and  $n = 3$  for *Pg\_Rp*, *Pg\_Wp*, *Pg\_P* and *Pg\_S* samples) (from [2], with permission).

| Nº | Code                | RSC (1.5 min) (%)   | RSC (15 min) (%)    |
|----|---------------------|---------------------|---------------------|
| 1  | <i>Pg_J(1:50)</i>   | 15.99 ( $\pm$ 3.22) | 33.55 ( $\pm$ 5.36) |
| 2  | <i>Pg_J(1:100)</i>  | 8.03 ( $\pm$ 2.76)  | 17.68 ( $\pm$ 5.11) |
| 3  | <i>Pg_Rp(1:50)</i>  | 46.97 ( $\pm$ 5.64) | 48.94 ( $\pm$ 5.43) |
| 4  | <i>Pg_Rp(1:100)</i> | 54.19 ( $\pm$ 5.75) | 58.38 ( $\pm$ 7.96) |
| 5  | <i>Pg_Wp(1:50)</i>  | 46.88 ( $\pm$ 4.44) | 48.39 ( $\pm$ 4.54) |
| 6  | <i>Pg_Wp(1:100)</i> | 54.87 ( $\pm$ 7.62) | 64.99 ( $\pm$ 6.22) |
| 7  | <i>Pg_P(1:50)</i>   | 50.9 ( $\pm$ 2.58)  | 53.3 ( $\pm$ 2.97)  |
| 8  | <i>Pg_P(1:100)</i>  | 48.51 ( $\pm$ 6.81) | 59.32 ( $\pm$ 5.23) |
| 9  | <i>Pg_S(1:50)</i>   | 5.12 ( $\pm$ 0.34)  | 9.48 ( $\pm$ 0.32)  |
| 10 | <i>Pg_S(1:100)</i>  | 3.91 ( $\pm$ 0.91)  | 7.22 ( $\pm$ 1.77)  |

**Table S7.** Antioxidant activity results (RSC – radical scavenging activity, %, at various reaction times) for other fruit extracts (*Kw\_P20/60/100* – kiwi pulp extracts in 20%, 60% and absolute ethanol; *Kw\_L20/60/100* – kiwi peel extracts in 20%, 60% and absolute ethanol). Values are means of duplicate analysis, with RSD < 5% (from [3], with permission).

| Nº | Code           | RSC (15 min) (%) |
|----|----------------|------------------|
| 1  | <i>Kw_P20</i>  | 24.50            |
| 2  | <i>Kw_P60</i>  | 14.80            |
| 3  | <i>Kw_P100</i> | 41.00            |
| 4  | <i>Kw_L20</i>  | 49.30            |
| 5  | <i>Kw_L60</i>  | 84.10            |
| 6  | <i>Kw_L100</i> | 55.80            |

## 2. DPPH $\cdot$ reaction kinetics in the presence of the unripe and ripe papaya extracts

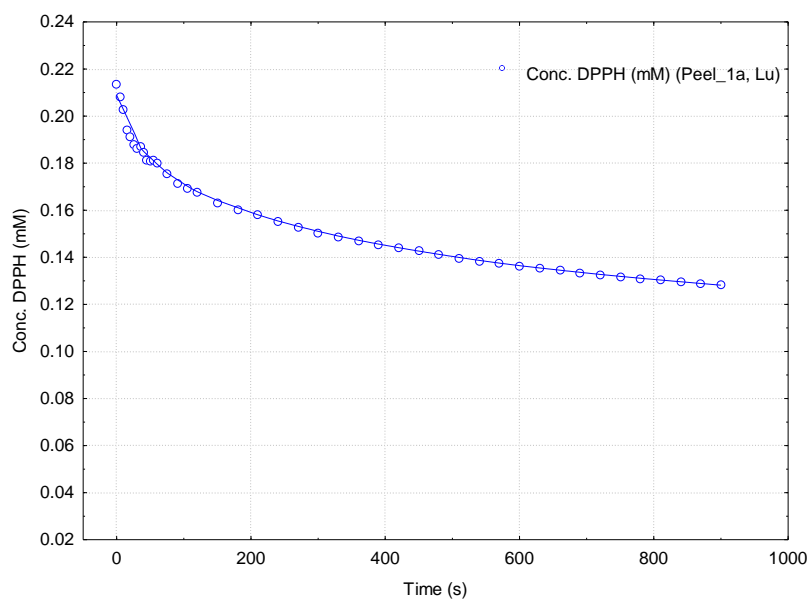

**Figure S3.** DPPH $\cdot$  concentration (mM) versus Time (s) for the unripe papaya peel extract (code Lu), one determination.

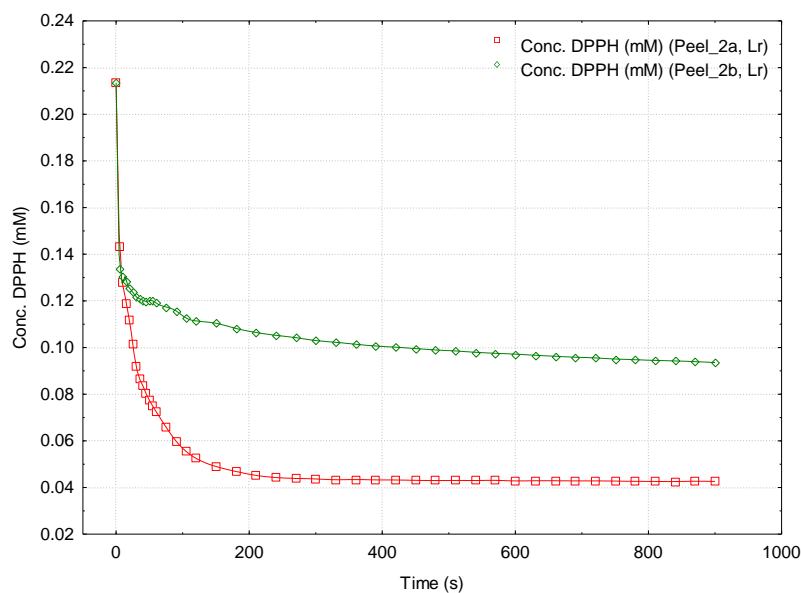

**Figure S4.** DPPH $\cdot$  concentration (mM) versus Time (s) for the ripe papaya peel extract (code Lr), duplicate analysis.

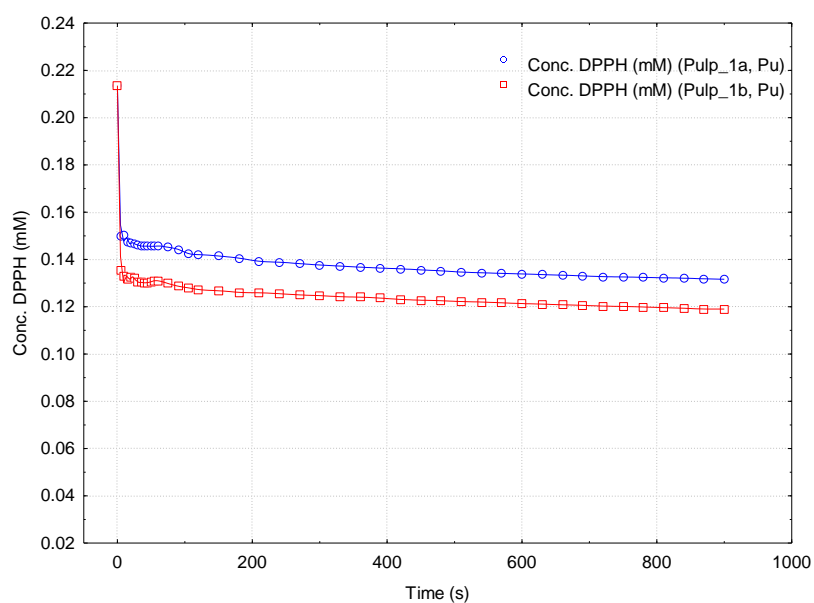

**Figure S5.** DPPH $\cdot$  concentration (mM) versus Time (s) for the unripe papaya pulp extract (code Pu), duplicate analysis.

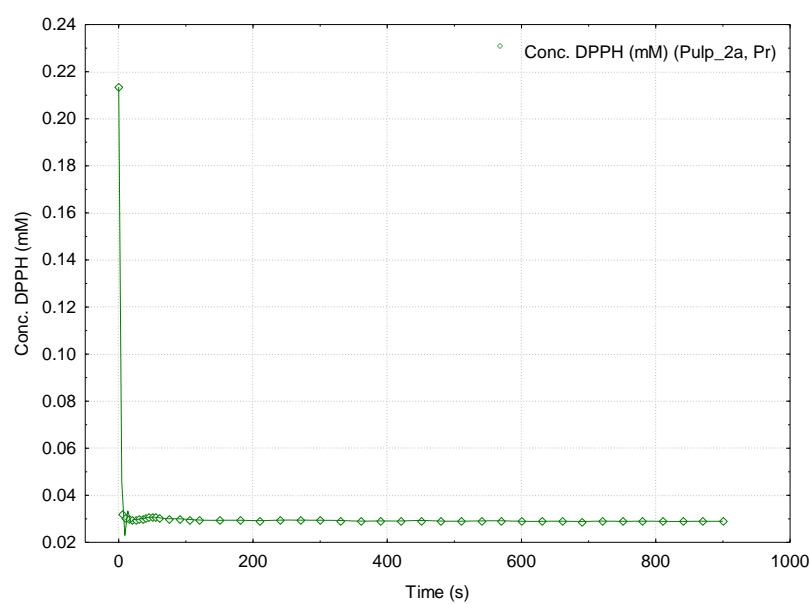

**Figure S6.** DPPH $\cdot$  concentration (mM) versus Time (s) for the ripe papaya pulp extract (code Pr), one determination.

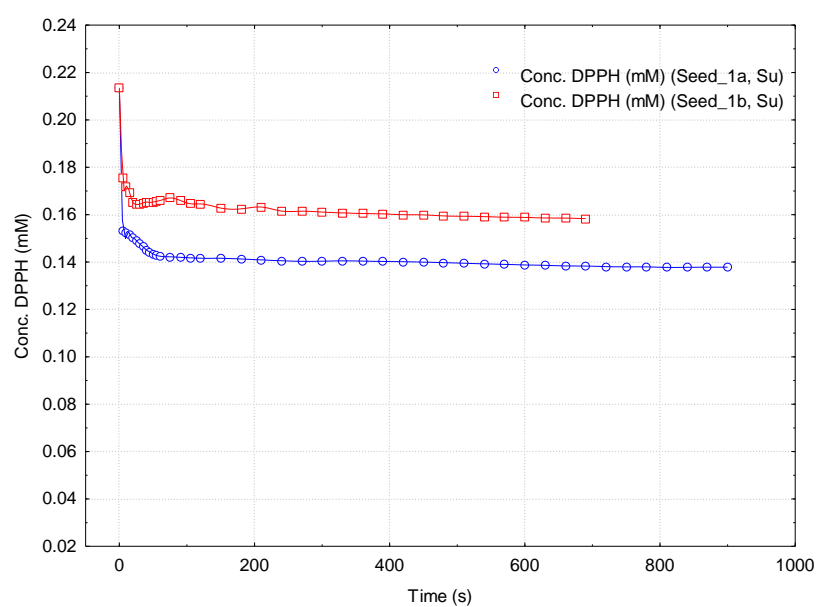

**Figure S7.** DPPH· concentration (mM) versus Time (s) for the unripe papaya seed extract (code *Su*), duplicate analysis.

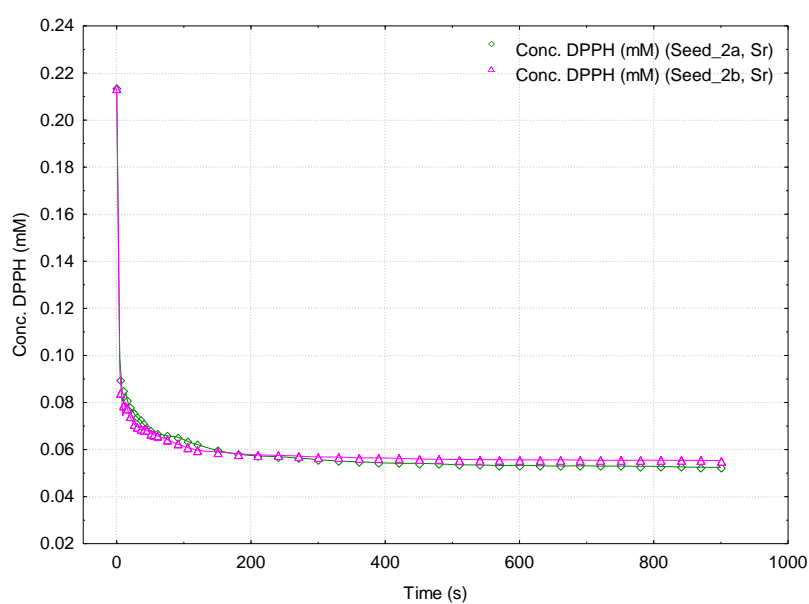

**Figure S8.** DPPH· concentration (mM) versus Time (s) for the ripe papaya seed extract (code *Sr*), duplicate analysis.



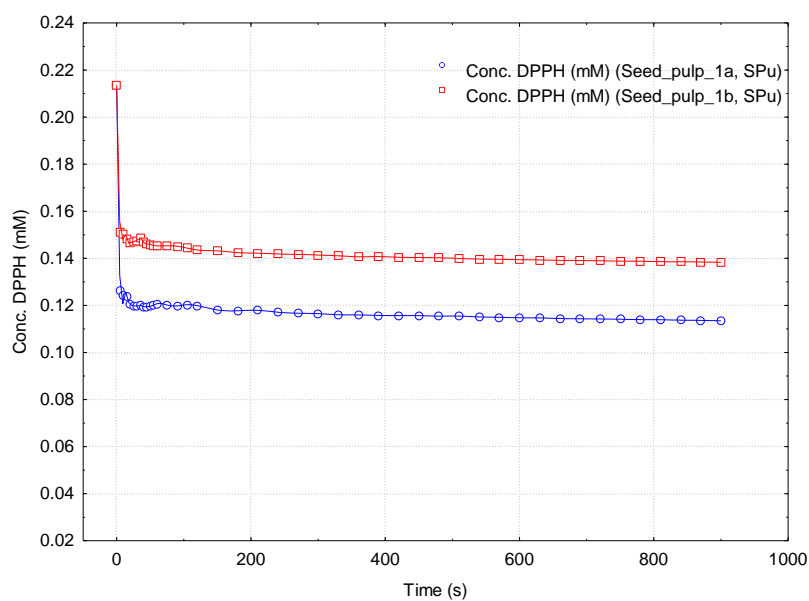

**Figure S9.** DPPH· concentration (mM) versus Time (s) for the unripe papaya seed-pulp extract (code *SPu*), duplicate analysis.

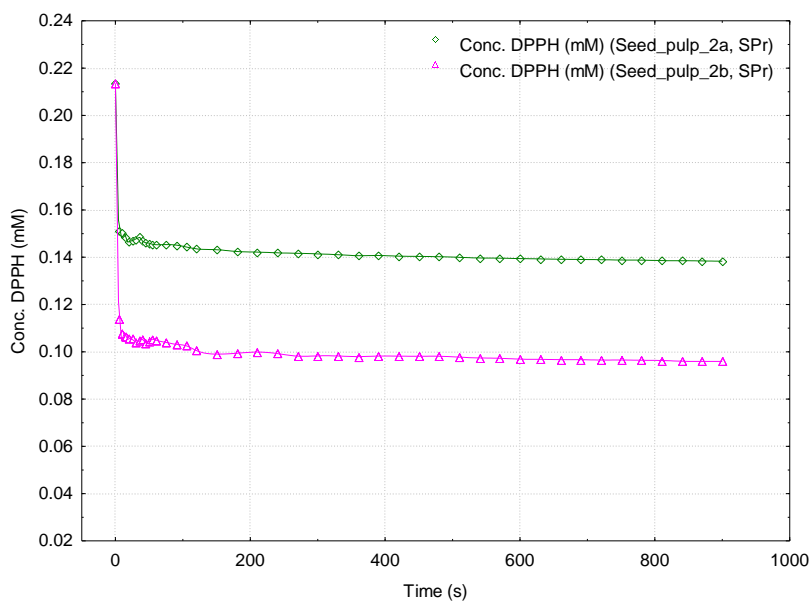

**Figure S10.** DPPH· concentration (mM) versus Time (s) for the ripe papaya seed-pulp extract (code *SPPr*), duplicate analysis.

**Table S8.** Significant  $p$ -levels from the Fisher's LSD test (least significant difference) for the DPPH· reaction rate on the  $t_1 = 0$ –30 s time range in the presence of papaya extracts ( $v_1$ ,  $\mu\text{M/s}$ ; unripe papaya peel, pulp, seed and seed-pulp:  $Lu$ ,  $Pu$ ,  $Su$  and  $SPu$ ; ripe papaya peel, pulp, seed and seed-pulp:  $Lr$ ,  $Pr$ ,  $Sr$  and  $SPr$ ).  $p$ -level values lower than 0.05 are bolded.

|            | <i>Lu</i> | <i>Lr</i>       | <i>Pu</i> | <i>Pr</i>       | <i>Su</i>       | <i>Sr</i>       | <i>SPu</i>      | <i>SPr</i>      |
|------------|-----------|-----------------|-----------|-----------------|-----------------|-----------------|-----------------|-----------------|
| <i>Lu</i>  |           | <b>0.042626</b> | 0.324667  | <b>0.010951</b> | 0.496345        | <b>0.017784</b> | 0.496345        | <b>0.039135</b> |
| <i>Lr</i>  |           |                 | 0.090636  | 0.088233        | 0.107066        | 0.309577        | 0.107066        | 0.920907        |
| <i>Pu</i>  |           |                 |           | <b>0.015394</b> | 0.808476        | <b>0.027721</b> | 0.808476        | 0.080651        |
| <i>Pr</i>  |           |                 |           |                 | <b>0.020171</b> | 0.265136        | <b>0.020171</b> | 0.097144        |
| <i>Su</i>  |           |                 |           |                 |                 | <b>0.039135</b> | 1.000000        | 0.097144        |
| <i>Sr</i>  |           |                 |           |                 |                 |                 | <b>0.039135</b> | 0.350108        |
| <i>SPu</i> |           |                 |           |                 |                 |                 |                 | 0.097144        |
| <i>SPr</i> |           |                 |           |                 |                 |                 |                 |                 |

**Table S9.** Significant  $p$ -levels from the Fisher's LSD test (least significant difference) for the DPPH· reaction rate on the  $t_1 = 0$ –30 s time range in the presence of papaya extracts ( $v_1$ ,  $\mu\text{M/s}$ ; unripe papaya peel, pulp, seed and seed-pulp:  $Lu$ ,  $Pu$ ,  $Su$  and  $SPu$ ; ripe papaya peel, pulp, seed and seed-pulp:  $Lr$ ,  $Pr$ ,  $Sr$  and  $SPr$ ).  $p$ -level values lower than 0.05 are bolded.

|            | <i>Lu</i> | <i>Lr</i> | <i>Pu</i> | <i>Pr</i> | <i>Su</i> | <i>Sr</i> | <i>SPu</i> | <i>SPr</i> |
|------------|-----------|-----------|-----------|-----------|-----------|-----------|------------|------------|
| <i>Lu</i>  |           | 0.566691  | 0.445552  | 0.497436  | 0.723043  | 0.836951  | 0.639584   | 0.439860   |
| <i>Lr</i>  |           |           | 0.146409  | 0.211887  | 0.347799  | 0.360103  | 0.293696   | 0.144029   |
| <i>Pu</i>  |           |           |           | 0.988407  | 0.705437  | 0.486206  | 0.806830   | 0.989432   |
| <i>Pr</i>  |           |           |           |           | 0.733519  | 0.556309  | 0.822418   | 0.997036   |
| <i>Su</i>  |           |           |           |           |           | 0.836951  | 0.906179   | 0.697659   |
| <i>Sr</i>  |           |           |           |           |           |           | 0.733940   | 0.478746   |
| <i>SPu</i> |           |           |           |           |           |           |            | 0.798573   |
| <i>SPr</i> |           |           |           |           |           |           |            |            |

**Table S10.** Significant  $p$ -levels from the Fisher's LSD test (least significant difference) for the DPPH· reaction rate on the  $t_3 = 80$ –900 s time range in the presence of papaya extracts ( $v_3$ ,  $\mu\text{M/s}$ ; unripe papaya peel, pulp, seed and seed-pulp:  $Lu$ ,  $Pu$ ,  $Su$  and  $SPu$ ; ripe papaya peel, pulp, seed and seed-pulp:  $Lr$ ,  $Pr$ ,  $Sr$  and  $SPr$ ).  $p$ -level values lower than 0.05 are bolded.

|            | <i>Lu</i> | <i>Lr</i>       | <i>Pu</i>       | <i>Pr</i>       | <i>Su</i>       | <i>Sr</i>       | <i>SPu</i>      | <i>SPr</i>      |
|------------|-----------|-----------------|-----------------|-----------------|-----------------|-----------------|-----------------|-----------------|
| <i>Lu</i>  |           | <b>0.005997</b> | <b>0.003771</b> | <b>0.002367</b> | <b>0.003273</b> | <b>0.002592</b> | <b>0.003869</b> | <b>0.001733</b> |
| <i>Lr</i>  |           |                 | 0.424297        | 0.060263        | 0.125043        | 0.168457        | 0.182084        | 0.059586        |
| <i>Pu</i>  |           |                 |                 | 0.134699        | 0.293031        | 0.473669        | 0.425173        | 0.160836        |
| <i>Pr</i>  |           |                 |                 |                 | 0.597528        | 0.287532        | 0.442219        | 0.664336        |
| <i>Su</i>  |           |                 |                 |                 |                 | 0.602578        | 0.793829        | 0.855970        |
| <i>Sr</i>  |           |                 |                 |                 |                 |                 | 0.820739        | 0.405762        |
| <i>SPu</i> |           |                 |                 |                 |                 |                 |                 | 0.633005        |
| <i>SPr</i> |           |                 |                 |                 |                 |                 |                 |                 |

**Table S11.** DPPH· reaction rates ( $v_{1-3}$  –  $\mu\text{M/s}$ , at  $t_{1-3}$  time ranges: 0–60 s, 60–180 s, and 180–900 s, respectively) for standard antioxidant compounds (PG\_1mM/0.2mM/0.1mM/0.05mM – propyl gallate ethanolic solutions at concentrations of 1, 0.2, 0.1 and 0.05 mM; CA\_1mM/0.2mM/0.1mM/0.05mM – caffeic acid ethanolic solutions at concentrations of 1, 0.2, 0.1 and 0.05 mM; BHA\_1mM/0.2mM/0.1mM/0.05mM – *tert*-butylated hydroxyanisole ethanolic solutions at concentrations of 1, 0.2, 0.1 and 0.05 mM). Values are means of duplicate analysis, with RSD < 5% (from [1], with permission).

| Nº | Code       | DPPH· reaction rate on<br>$t_1$ time range, $v_1$ ( $\mu\text{M/s}$ ) | DPPH· reaction rate on<br>$t_2$ time range, $v_2$ ( $\mu\text{M/s}$ ) | DPPH· reaction rate on<br>$t_3$ time range, $v_3$ ( $\mu\text{M/s}$ ) |
|----|------------|-----------------------------------------------------------------------|-----------------------------------------------------------------------|-----------------------------------------------------------------------|
| 1  | PG_1mM     | 1.90                                                                  | -                                                                     | 0.001                                                                 |
| 2  | PG_0.2mM   | 1.90                                                                  | 0.10                                                                  | 0.030                                                                 |
| 3  | PG_0.1mM   | 1.20                                                                  | 0.05                                                                  | 0.015                                                                 |
| 4  | PG_0.05mM  | 1.00                                                                  | 0.10                                                                  | 0.008                                                                 |
| 5  | CA_1mM     | 2.50                                                                  | 0.40                                                                  | 0.023                                                                 |
| 6  | CA_0.2mM   | 1.30                                                                  | 0.20                                                                  | 0.025                                                                 |
| 7  | CA_0.1mM   | 1.30                                                                  | 0.07                                                                  | 0.007                                                                 |
| 8  | CA_0.05mM  | 0.50                                                                  | 0.02                                                                  | 0.003                                                                 |
| 9  | BHA_1mM    | 1.20                                                                  | 0.90                                                                  | 0.097                                                                 |
| 10 | BHA_0.2mM  | -                                                                     | 0.30                                                                  | 0.065                                                                 |
| 11 | BHA_0.1mM  | 0.20                                                                  | 0.07                                                                  | 0.037                                                                 |
| 12 | BHA_0.05mM | 0.30                                                                  | 0.06                                                                  | 0.014                                                                 |

**Table S12.** DPPH· reaction rates ( $v_{1-3}$  –  $\mu\text{M/s}$ , at  $t_{1-3}$  time ranges: 0–30 s, 30–90 s, and 90–900 s, respectively) for other fruit extracts (Pg\_J(1:50/1:100) – pomegranate raw juice, 1:50 and 1:100 dilution; Pg\_Rp/Wp(1:50/1:100) – pomegranate red/white peel ethanolic extracts, 1:50 and 1:100 dilution; Pg\_P/S – pomegranate pulp and seed ethanolic extracts, 1:50 and 1:100 dilution). Values are expressed as mean ( $\pm$ standard deviation, SD) for multiplicate analysis ( $n = 7$  for Pg\_J samples and  $n = 3$  for Pg\_Rp, Pg\_Wp, Pg\_P and Pg\_S samples) (from [2], with permission).

| Nº | Code         | DPPH· reaction rate on<br>$t_1$ time range, $v_1$ ( $\mu\text{M/s}$ ) | DPPH· reaction rate on<br>$t_2$ time range, $v_2$ ( $\mu\text{M/s}$ ) | DPPH· reaction rate on<br>$t_3$ time range, $v_3$ ( $\mu\text{M/s}$ ) |
|----|--------------|-----------------------------------------------------------------------|-----------------------------------------------------------------------|-----------------------------------------------------------------------|
| 1  | Pg_J(1:50)   | 0.69 ( $\pm 0.25$ )                                                   | 0.26 ( $\pm 0.13$ )                                                   | 0.05 ( $\pm 0.01$ )                                                   |
| 2  | Pg_J(1:100)  | 0.36 ( $\pm 0.13$ )                                                   | 0.14 ( $\pm 0.06$ )                                                   | 0.03 ( $\pm 0.01$ )                                                   |
| 3  | Pg_Rp(1:50)  | 2.97 ( $\pm 0.25$ )                                                   | 0.23 ( $\pm 0.12$ )                                                   | 0.005 ( $\pm 0.001$ )                                                 |
| 4  | Pg_Rp(1:100) | 3.03 ( $\pm 0.06$ )                                                   | 0.47 ( $\pm 0.23$ )                                                   | 0.006 ( $\pm 0.001$ )                                                 |
| 5  | Pg_Wp(1:50)  | 2.83 ( $\pm 0.32$ )                                                   | 0.30 ( $\pm 0.00$ )                                                   | 0.003 ( $\pm 0.000$ )                                                 |
| 6  | Pg_Wp(1:100) | 2.80 ( $\pm 0.52$ )                                                   | 0.60 ( $\pm 0.00$ )                                                   | 0.007 ( $\pm 0.004$ )                                                 |
| 7  | Pg_P(1:50)   | 2.93 ( $\pm 0.15$ )                                                   | 0.37 ( $\pm 0.06$ )                                                   | 0.004 ( $\pm 0.001$ )                                                 |
| 8  | Pg_P(1:100)  | 2.43 ( $\pm 0.38$ )                                                   | 0.60 ( $\pm 0.10$ )                                                   | 0.019 ( $\pm 0.006$ )                                                 |
| 9  | Pg_S(1:50)   | 0.20 ( $\pm 0.00$ )                                                   | 0.07 ( $\pm 0.02$ )                                                   | 0.01 ( $\pm 0.001$ )                                                  |
| 10 | Pg_S(1:100)  | 0.17 ( $\pm 0.06$ )                                                   | 0.05 ( $\pm 0.02$ )                                                   | 0.007 ( $\pm 0.002$ )                                                 |

## References

1. Ivanovici, M.; Sicoe, G.; Hădărugă, D.I. Kinetics and antiradical activity of natural and synthetic phenolic compounds by DPPH method: a comparative study. *Journal of Agroalimentary Processes and Technologies* **2018**, *24*, 97–103.
2. Sicoe, G.; Oprinescu, C.I.; Golea, G.M.; Riviș, A.; Hădărugă, N.G. Kinetics on the DPPH· reaction with hydroalcoholic extracts from various pomegranate parts. *Journal of Agroalimentary Processes and Technologies* **2017**, *23*, 271–280.
3. Hădărugă, D.I.; Pantea, C.; Hădărugă, N.G. Antioxidant activity and kinetics on kiwi fruit (*Actinidia deliciosa*) ethanolic extracts by 2,2-diphenyl-1-picrylhydrazyl (DPPH·) method. *Journal of Agroalimentary Processes and Technologies* **2016**, *22*, 207–211.
